# Supplementary material for: Proton coupled electron transfer of ubiquinone Q2 incorporated in a self-assembled monolayer
Source: Royal Society of Chemistry journal article supplement (doi:10.1039/c0cp02700f), 2011-01-01
Supplement: c0cp02700f.pdf [file c0cp02700f.pdf]

## Electronic Supplementary information

### Proton Coupled Electron Transfer of Ubiquinone Q<sub>2</sub> Incorporated in Self-Assembled Monolayer

Celia Lemmer,<sup>a</sup> Marcel Bouvet<sup>a</sup> and Rita Meunier-Prest <sup>\*a</sup>

Determination of the pK<sub>ai</sub> values using the Hammett correlation.

For the right part of the nine-member square scheme, the different pK<sub>ai</sub> collected in the literature are summarized in Table 1. We decided to correlate all these data using the Hammett sigma plots.<sup>1</sup> Indeed, the Hammett equation was successfully applied to quinones,<sup>2-3</sup> and the change in the pK<sub>ai</sub> values can be described by a Hammett-type approach analog to the changes of the redox potential.<sup>4</sup>

The slope of the straight line expresses the sensitivity of the protonation reaction to substituent effect. The Hammett substitution constant,  $\sigma$ , reflects the influence of the substituent on the pK<sub>ai</sub> value. When the quinone is substituted by more than one group, the substituent constant is the sum of the individual substituent constant  $\Sigma\sigma_i$ .<sup>2-3</sup>

It was demonstrated that the best correlations were obtained using the  $\sigma_{para}$  constants in benzene derivatives.<sup>2, 4-5</sup> Moreover, in the case of the halogeno substituents, the  $\sigma_{meta}$  constants were used instead of the  $\sigma_{para}$  constants because they reflect more accurately the inductive effects of the halogeno group in the quinone system.<sup>5-6</sup> In Table 1,  $\Sigma\sigma_i$  corresponds to the sum of the  $\sigma_{para}$  constants except for the halogeno substituents for which we used  $\sigma_{meta}$  values.

The variations of pK<sub>a4</sub>, pK<sub>a5</sub> and pK<sub>a6</sub> with  $\Sigma\sigma_i$  are presented in Fig. 1. They show good correlations with regression coefficients from 0.914 to 0.96.

Table1: Acidity constants of substituted 1,4-benzoquinones

| 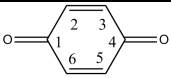 | $\Sigma\sigma_i$ | pK <sub>a4</sub>     | pK <sub>a5</sub>    | pK <sub>a6</sub>    |
|-------------------------------------------------------------------------------------|------------------|----------------------|---------------------|---------------------|
| <i>Substituents</i>                                                                 |                  |                      |                     |                     |
| 2,6-dichloro                                                                        | 0.74             |                      | 7.3 <sup>14</sup>   | 10 <sup>14</sup>    |
| 2,5-dichloro                                                                        | 0.74             |                      | 7.9 <sup>15</sup>   | 10 <sup>15</sup>    |
| 2-nitro                                                                             | 0.71             |                      | 7.42 <sup>16</sup>  | 10.11 <sup>16</sup> |
| 2-bromo                                                                             | 0.23             |                      | 8.67 <sup>16</sup>  | 10.68 <sup>16</sup> |
| 2-chloro                                                                            | 0.23             |                      | 8.9 <sup>15</sup>   | 11 <sup>15</sup>    |
|                                                                                     | 0.23             |                      | 8.81 <sup>16</sup>  | 10.78 <sup>16</sup> |
| 2-sulfonate                                                                         | 0.05             |                      | 9.57 <sup>15</sup>  | 11.9 <sup>15</sup>  |
| None                                                                                | 0                | 4.1 <sup>7</sup>     | 9.85 <sup>14</sup>  | 11.4 <sup>14</sup>  |
|                                                                                     | 0                | 4 <sup>8</sup>       | 9.9 <sup>17</sup>   | 11.9 <sup>17</sup>  |
| 2- <i>tert</i> -butyl                                                               | -0.10            | 4.3 <sup>9</sup>     |                     |                     |
| 2-methyl                                                                            | -0.17            | 4.45 <sup>10</sup>   | 10.1 <sup>14</sup>  | 11.6 <sup>14</sup>  |
| 2,3-dimethyl                                                                        | -0.34            | 4.65 <sup>10</sup>   | 10.43 <sup>15</sup> | 12.6 <sup>15</sup>  |
| 2,5-dimethyl                                                                        | -0.34            | 4.6 <sup>11-12</sup> | 10.38 <sup>15</sup> | 12.5 <sup>15</sup>  |
| 2,6-dimethyl                                                                        | -0.34            | 4.75 <sup>10</sup>   | 10.35 <sup>15</sup> | 12.4 <sup>15</sup>  |
|                                                                                     | -0.34            |                      | 10.2 <sup>18</sup>  | 12.8 <sup>18</sup>  |
| 2,3-dimethyl-5-nonaprenyl (plastoquinone)                                           | -0.50            | 4.7 <sup>13</sup>    | 10.8 <sup>19</sup>  |                     |
| 2,3,5-trimethyl                                                                     | -0.51            | 4.95 <sup>10</sup>   | 10.8 <sup>15</sup>  | 12.9 <sup>15</sup>  |
| tetramethyl (duroquinone)                                                           | -0.68            | 5.1 <sup>11-12</sup> | 11.3 <sup>14</sup>  | 12.7 <sup>14</sup>  |

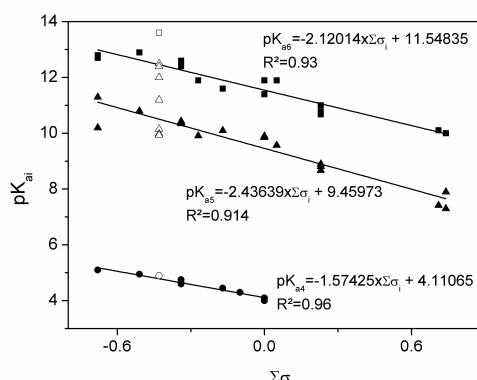

Fig. 1: Hammett correlations: plots of  $pK_{a4}$  (dark circle),  $pK_{a5}$  (dark triangle) and  $pK_{a6}$  (dark square) with  $\Sigma\sigma_i$  for the different substituted 1,4-benzoquinones of Table 1. Values of  $pK_{a4}$  (open circle),  $pK_{a5}$  (open triangle) and  $pK_{a6}$  (open square) for the different  $UQ_n$  collected in Table 2 ( $\Sigma\sigma_i = -0.43$ ).

Using these correlations it is now possible to estimate the  $pK_{ai}$  values of  $UQ_2$  and more generally  $UQ_n$ . Prince demonstrated that the  $\sigma_{para}$  value for the prenyl substituent is  $-0.16$ .<sup>2</sup> No significant difference was observed between polyprenyl chains when  $1 < n < 10$ .<sup>2</sup> Concerning the methoxy group, it was established that a single methoxy group has a  $\sigma_{para}$  value of  $-0.27$  but when two methoxy groups are adjacent like in  $UQ_n$ , the apparent  $\sigma_{para}$  value is only  $-0.10$  for both.<sup>2, 5</sup> This is attributed to the steric inhibition of resonance when the two methoxy groups are adjacent.<sup>2, 20</sup> Rubinson<sup>21</sup> proposes a more geometric picture of the correlations and comes to the same conclusion if the methoxy group blocked the normal preferred path. The  $\Sigma\sigma_i$  value for  $UQ_n$  is thus  $\Sigma\sigma_i = \sigma_{prenyl} + \sigma_{2 \text{ adjacent OMe}} + \sigma_{Me} = -0.16 - 0.10 - 0.17 = -0.43$ . By reporting this value into the graph of Fig. 1, we obtained  $pK_{a4} = 4.79 \pm 0.09$ ,  $pK_{a5} = 10.51 \pm 0.16$  and  $pK_{a6} = 12.46 \pm 0.13$ .

Let us compare these values to data collected in the literature. They are indicated in Table 2 for different chain lengths ( $UQ_n$  with  $n=2, 6, 9, 10$ ) and reported on the graph of Fig. 1.

Table2: Acidity constants of coenzymes  $UQ_n$

| Coenzyme $Q_n$ | $pK_{a4}$         | $pK_{a5}$           | $pK_{a6}$          |
|----------------|-------------------|---------------------|--------------------|
| $UQ_2$         |                   | 12.4 <sup>22</sup>  |                    |
| $UQ_6$         |                   | 10.15 <sup>23</sup> |                    |
| $UQ_9$         |                   | 9.98 <sup>23</sup>  |                    |
| $UQ_{10}$      | 4.9 <sup>13</sup> | 12 <sup>16</sup>    | 13.6 <sup>16</sup> |
|                |                   | 9.94 <sup>23</sup>  |                    |
|                |                   | 11.2 <sup>19</sup>  |                    |
|                |                   | 12.5 <sup>22</sup>  |                    |

The  $pK_{a4}$  value obtained by pulse radiolysis<sup>13</sup> for  $UQ_{10}$  is in good agreement with the Hammett treatment.

Only one  $pK_{a6}$  value was determined.<sup>16</sup> It is quite high compared to those deduced from the Hammett correlation (Fig.1) may be due to the fact that  $UQ_{10}$  is adsorbed flat on the mercury electrode, therefore the environment is completely different and may induce a higher  $pK_{a6}$  value.

Concerning  $pK_{a5}$ , the literature results were essentially obtained for  $UQ_{10}$ . There is a great discrepancy between the values from 9.94<sup>23</sup> to 12.5.<sup>22</sup> Ksenzhek et Al.<sup>23</sup> studied three coenzymes,  $UQ_6$ ,  $UQ_9$  and  $UQ_{10}$ , by thin layer voltammetry on carbon electrode. In the entire pH range, the variation of  $E^{o'}$  with pH is equal to  $-60$  mV / pH unit. The authors supposed that in basic medium ( $pH > 10.1$ ) the oxidized form exists as an anion due to an  $OH^-$  conjugated with one of the oxygen atoms. Therefore  $pK_{a5}$  must have nearly the same value to explain the slope of  $-60$  mV / pH unit. The other literature result concerns  $UQ_{10}$  incorporated in supported phospholipid layers.<sup>22</sup> The authors recorded the voltammograms at different pH and at a scan rate of  $0.1$  Vs<sup>-1</sup>. They reported the variations of the anodic ( $E_{pa}$ ) and cathodic ( $E_{pc}$ ) peak potentials with pH at this scan rate. Both varied linearly with pH. The slopes are respectively  $-60$  mV and  $-60$  mV for  $pH < 9$ ,  $-120$  mV and  $0$

for  $9 < \text{pH} < 12.5$  and  $-60 \text{ mV}$  and  $0$  for  $\text{pH} > 12.5$ . We wanted to compare these results with ours. We plotted the graph  $E_{\text{pa}}$  and  $E_{\text{pc}}$  in function of  $\text{pH}$  at  $0.1 \text{ V s}^{-1}$  (Fig. 2). We obtained exactly the same variations and the same slopes. The change in slopes were observed for  $\text{pH}=8.8$ , i.e. approximately the same as those obtained for  $\text{UQ}_{10}$ .<sup>22</sup> It should be noted that working at only one scan rate gives a partial view of the electrochemical behavior of the system. Indeed, the existence of a nine member square scheme implies that the cathodic and anodic peak potentials vary diversely with scan rate. Moreover, the reaction kinetics depending on  $\text{pH}$ , it is not possible to have access to the exact value of  $E^{\circ}$ . The only way to obtain  $E^{\circ}$  is to extrapolate its value by superimposing the theoretical curve<sup>24</sup> with the variations of  $E_{\text{pa}}$  and  $E_{\text{pc}}$  with  $\log v$  as presented in Fig. 4 of the article. Therefore, until now the literature results on  $\text{UQ}_n$  present a great deal of uncertainty that can explain the discrepancy between the values collected in Table 2.

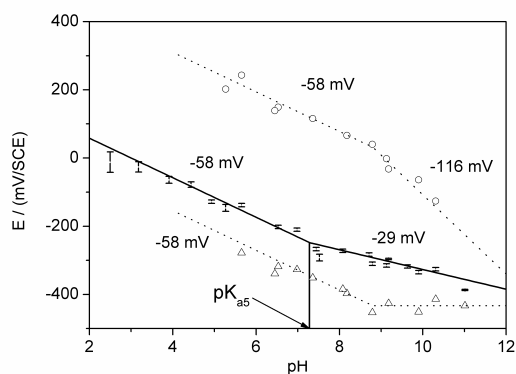

Fig. 2: pH dependence of  $E^{\circ}$ , cathodic (open triangle) and anodic peak potentials (open circle) at a scan rate of  $0.1 \text{ V s}^{-1}$ .

## References

1. L. P. Hammett, *J. Am. Chem. Soc.*, 1937, **59**, 96-103.
2. R. C. Prince, P. L. Dutton and J. M. Bruce, *Febs Lett.*, 1983, **160**, 273-276.
3. P. Zuman, *Substituent Effects in Organic Polarography*, Plenum, New York, 1967.
4. R. J. Dribergen, E. E. Moret, L. H. M. Janssen, J. S. Blauw, J. J. M. Holthuis, S. J. P. Kelder, W. Verboom, D. N. Reinhoudt and W. E. Vanderlinden, *Anal. Chim. Acta*, 1992, **257**, 257-273.
5. J. E. Heffner, C. T. Wigal and O. A. Moe, *Electroanalysis*, 1997, **9**, 629-632.
6. J. E. Heffner, J. C. Raber, O. A. Moe and C. T. Wigal, *J. Chem. Ed.*, 1998, **75**, 365-367.
7. R. L. Willson, *Trans. Farad. Soc.*, 1971, **67**, 3020-3029.
8. G. E. Adams and B. D. Michael, *Trans. Farad. Soc.*, 1967, **63**, 1171.
9. J. K. Dohrmann and B. Bergmann, *J. Phys. Chem.*, 1995, **99**, 1218-1227.
10. K. B. Patel and R. L. Willson, *J. Chem. Soc.-Farad. Trans. 1*, 1973, **69**, 814-825.
11. P. S. Rao and E. Hayon, *J. Phys. Chem.*, 1973, **77**, 2274-2276.
12. R. L. Wilson, *J. Chem. Soc. D-Chem. Comm.*, 1971, 1249.
13. A. J. Swallow, in *Physical chemistry of quinones*, ed. P. L. Trumpower, Academic Press, New York, 1982.
14. J. H. Baxendale and H. R. Hardy, *Trans. Farad. Soc.*, 1953, **49**, 1140-1144.
15. C. A. Bishop and L. K. J. Tong, *J. Am. Chem. Soc.*, 1965, **87**, 501-505.
16. G. J. Gordillo and D. J. Schiffrin, *J. Chem. Soc.-Faraday T.*, 1994, **90**, 1913-1922.
17. S. I. Bailey and I. M. Ritchie, *Electrochim. Acta*, 1985, **30**, 3-12.
18. S. Hay, K. Westerlund and C. Tommos, *J. Phys. Chem. B*, 2007, **111**, 3488-3495.
19. P. R. Rich, *Biochim. Biophys. Acta* 1984, **768**, 53-79.
20. J. R. Burie, C. Boullais, M. Nonella, C. Mioskowski, E. Nabedryk and J. Breton, *J. Phys. Chem. B*, 1997, **101**, 6607-6617.
21. K. A. Rubinson, *J. Phys. Chem.*, 1984, **88**, 148-156.
22. D. Marchal, W. Boireau, J. M. Laval, J. Moiroux and C. Bourdillon, *Biophys. J.*, 1997, **72**, 2679-2687.
23. O. S. Ksenzhek, S. A. Petrova and M. V. Kolodyazhny, *Bioelectroch. Bioener.*, 1982, **9**, 167-174.
24. E. Laviron, *J. Electroanal. Chem.*, 1979, **101**, 19-28.
